# Supplementary material for: NOX2 amplifies acetaldehyde-mediated cardiomyocyte mitochondrial dysfunction in alcoholic cardiomyopathy
Source: PubMed Central journal article supplement (PMC5021994; doi:10.1038/srep32554), 2016-09-14
Supplement: srep32554-s1.pdf [file srep32554-s1.pdf]

## Supplementary data

### **NOX2 amplifies acetaldehyde-mediated cardiomyocyte mitochondrial dysfunction in alcoholic cardiomyopathy**

**Moritz Brandt<sup>1,2</sup>, Venkata Garlapati<sup>2</sup>, Matthias Oelze<sup>1</sup>, Efthymios Sotiriou<sup>1</sup>, Maike Knorr<sup>1,2</sup>, Swenja Kröller-Schön<sup>1</sup>, Sabine Kossmann<sup>1</sup>, Tanja Schönfelder<sup>2</sup>, Henning Morawietz<sup>4</sup>, Eberhard Schulz<sup>1,3</sup>, Heinz-Peter Schultheiss<sup>5</sup>, Andreas Daiber<sup>1,3</sup>, Thomas Münzel<sup>1,2,3</sup>, Philip Wenzel<sup>1,2,3</sup>**

*From the <sup>1</sup>Center for Cardiology, Cardiology 1, <sup>2</sup>Center for Thrombosis and Hemostasis Mainz and German <sup>3</sup>Center for Cardiovascular Research (DZHK), partner site Rhine Main, University Medical Center Mainz, Langenbeckstr. 1, 55131 Mainz; <sup>4</sup>Division of Vascular Endothelium and Microcirculation, Department of Medicine III, University Hospital Carl Gustav Carus, Technische Universität Dresden, Fetscherstr. 74, 01307 Dresden, Germany, <sup>5</sup>Institut für kardiale Diagnostik und Therapie, Moltkestrasse 31, 12203 Berlin, Germany*

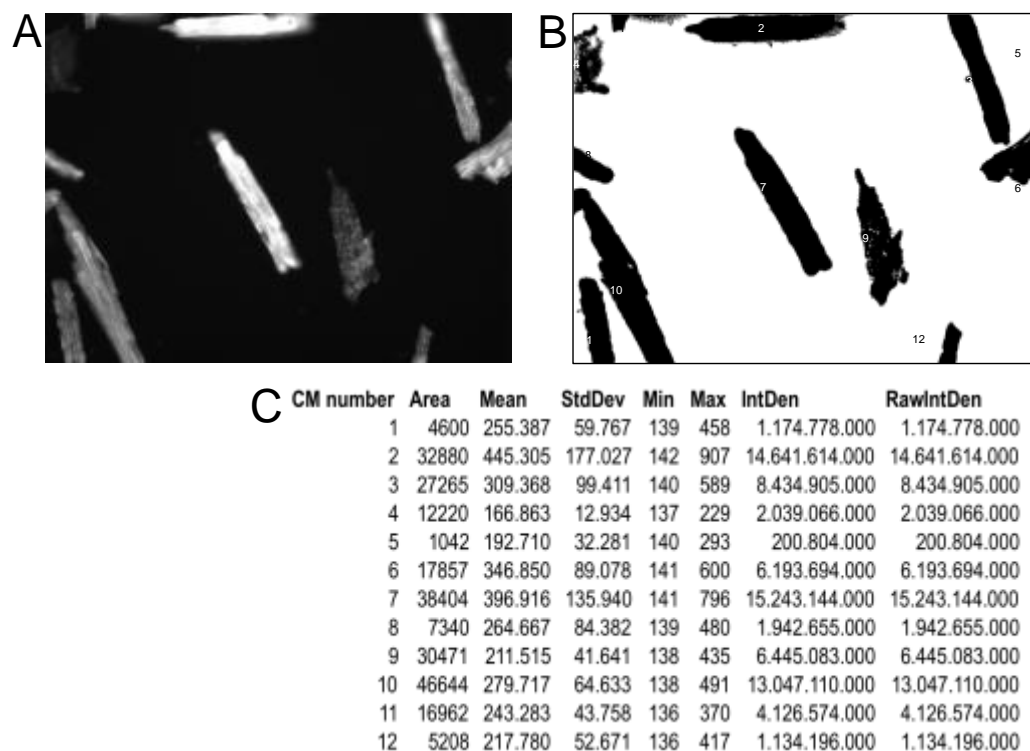

**Figure S1: Image quantification to measure MitoSOX- or TMRM<sup>+</sup>-enhanced fluorescence per cardiomyocyte.** After background subtraction to account for uneven illumination, raw images (A) were subjected to particle analysis algorithms (B) yielding multiple parameters per CM (C).

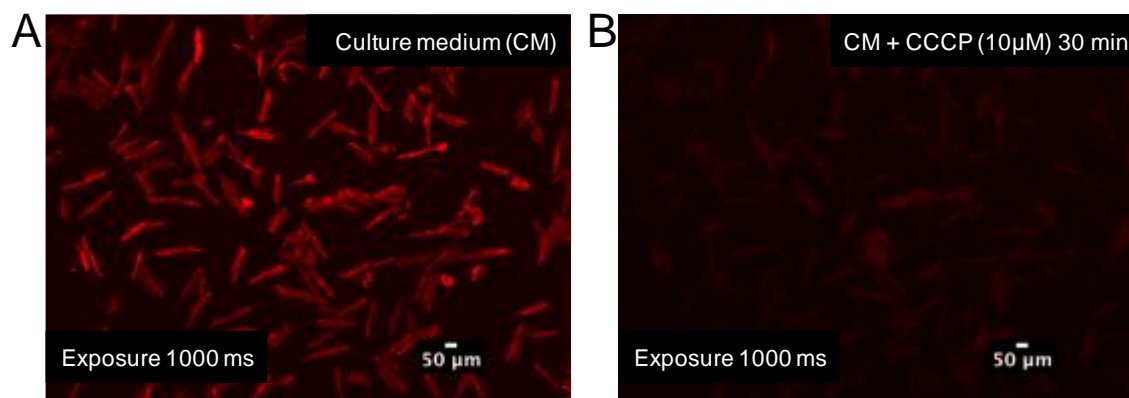

**Figure S2: Addition of the ionophore/mitochondrial uncoupler carbonyl cyanide *m*-chlorophenyl hydrazone (CCCP) to CM loaded with TMRM<sup>+</sup> (A) resulted in an almost complete loss of TMRM<sup>+</sup>-enhanced fluorescence indicating a complete mitochondrial depolarization (B).**

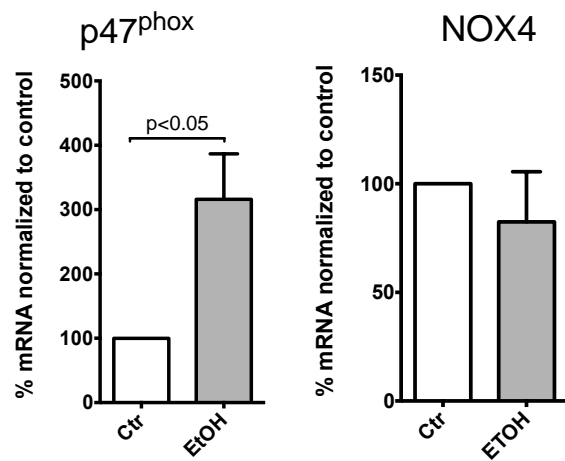

Figure S3: Effect of ethanol exposure of isolated cardiomyocytes on the expression of the NADPH subunit p47<sup>phox</sup> and NADPH oxidase 4 (NOX4). Data presented as the mean $\pm$ SEM.

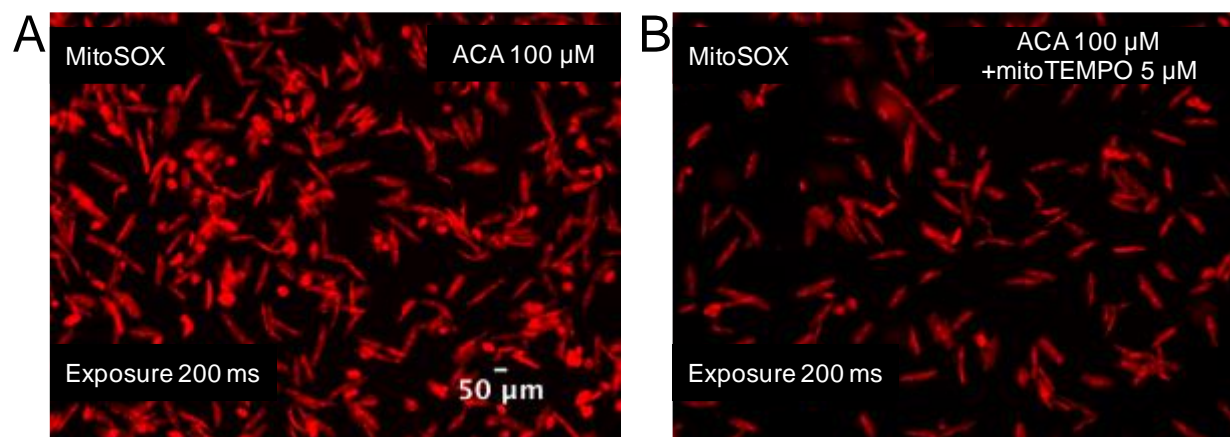

Figure S4: Effect of the mitochondrial specific antioxidant mitoTEMPO on CM ROS after exposure in culture media containing ACA 100  $\mu$ M.
